# Supplementary material
Source: Springer Nature journal article supplement (https://www.springermedizin.de/resource/supplementary/13013_2009_305_MOESM14_ESM.pdf/9631610)

**B1****Clinical Criteria**

- Pelvis translated to the convex thoracic side
- Trunk Imbalance to the concave thoracic side
- Noticeable rib hump and lumbar or thoracolumbar prominence

**Radiological Criteria**

- Double thoracic and lumbar or thoracic and thoracolumbar
- TP imbalance to the concave thoracic side
- T1 imbalance to the concave thoracic side
- Positive L5-4 counter-tilting

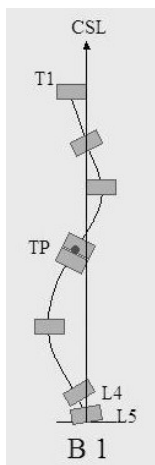**B2****Clinical Criteria**

- Pelvis translated to the convex thoracic side
- Trunk Imbalance to the concave thoracic side
- Noticeable thoracolumbar prominence associated to a minor thoracic hump

**Radiological Criteria**

- Major thoracolumbar combined with a minor thoracic curve
- TP imbalance to the concave thoracic side
- T1 imbalance to the concave thoracic side
- Positive L5-4 counter-tilting (often, positive L4-3 counter-tilting)

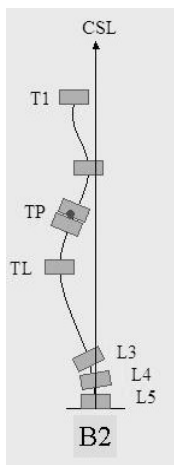**Brace Design**

- 4C 'classical' eventually pelvis open at the concave thoracic side

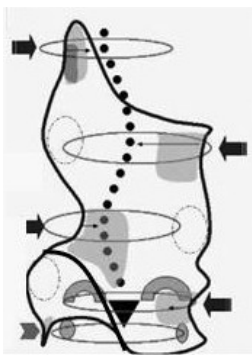**Brace Design**

- 4C 'classical'

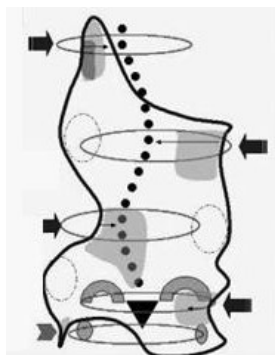

Supplement: MOESM14 [file 9631610]
